# Supplementary material for: Association of aescin with β- and γ-cyclodextrins studied by DFT calculations and spectroscopic methods
Source: publisher site journal article supplement (doi:10.3762/bjnano.8.37), 2017-02-03
Supplement: Additional file 1 [file 2190-4286-8-37-S1.pdf]

# Supporting Information 1

for

## Association of aescin with $\beta$ - and $\gamma$ -cyclodextrins studied by DFT calculations and spectroscopic methods

Ana I. Ramos<sup>\*1,2</sup>, Pedro D. Vaz<sup>3,4</sup>, Susana S. Braga<sup>5</sup> and Artur M. S. Silva<sup>5</sup>

Address: <sup>1</sup>CICECO, Complexo de Laboratórios Tecnológicos, Campus Universitário de Santiago, 3810-193 Aveiro, Portugal; <sup>2</sup>Current affiliation: INEGI-FEUP Faculty of Engineering of the University of Porto, Rua Dr. Roberto Frias, 4200-465, Porto, Portugal; <sup>3</sup>CQB, Departamento de Química e Bioquímica, Faculdade de Ciências da Universidade de Lisboa, 1749-016 Lisboa, Portugal; <sup>4</sup>ISIS Neutron & Muon Source, Rutherford Appleton Laboratory, Chilton, Didcot, Oxfordshire OX11 0QX, United Kingdom and <sup>5</sup>QOPNA, Departamento de Química, Universidade de Aveiro, Campus de Santiago, 3810-193 Aveiro, Portugal

Email: Ana I. Ramos - shortinha.sa@gmail.com

\* Corresponding author

**Supplement to <sup>1</sup>H NMR studies in solution**

**a) Attemptive Job plot for the H3 proton of  $\gamma$ CD in  $\gamma$ CD·aescin mixtures**

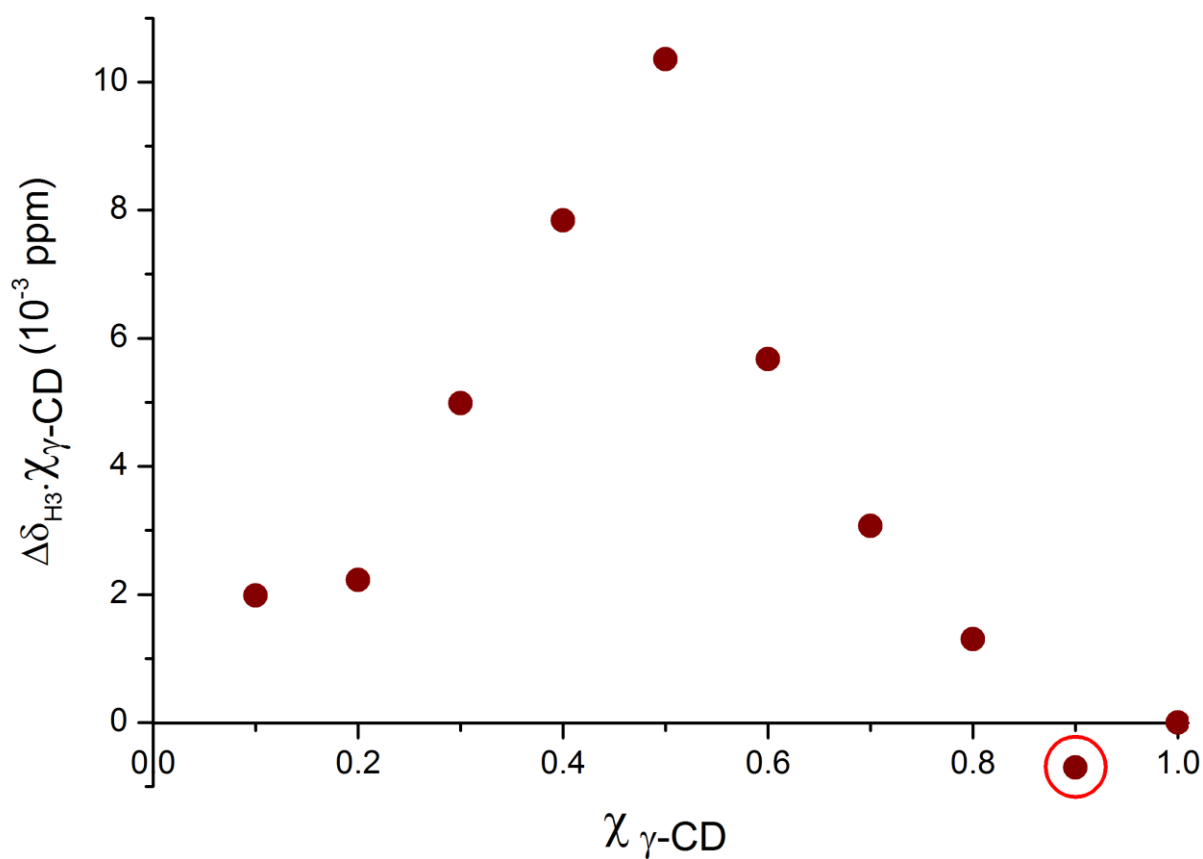

**Figure S1.1:** Job plot for the H3 proton of  $\gamma$ -CD in aqueous solutions containing  $\gamma$ -CD and aescin in a gradient of molar fraction. Note how the inconsistency in the proton shifts affords a negative value for the data point corresponding to the molar fraction of 0.9 (circled with red).

## b) Apparent Inclusion Constants for $\beta$ CD·aescin and $\gamma$ CD·aescin

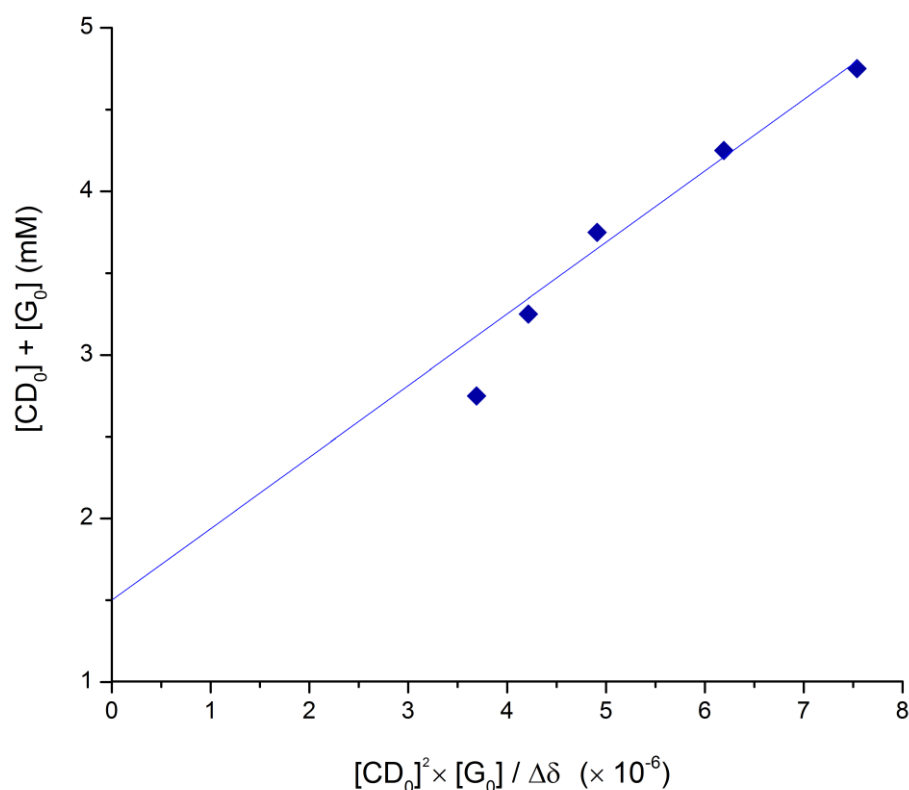

**Figure S1.2:** Graphical analysis of  $^1\text{H}$  NMR shifts of the H5 proton of  $\beta$ -CD of one assay comprising a series of aqueous solutions containing 0.25 mM of  $\beta$ -CD and 2.5, 3.0, 3.5, 4.0 and 4.5 mM of aescin. Data is fitted to a line with  $r^2$  value of 0.972 and  $x_0$  (yy-intercept) of 0.00151, which allows estimating, for this data set,  $K_{\text{app}} = 1/x_0 = 662 \text{ M}^{-1}$  (the values presented in the manuscript are the average ( $\pm$  RSD) of different calculated  $K_{\text{app}}$  values). The first data point was not used in the data fitting.

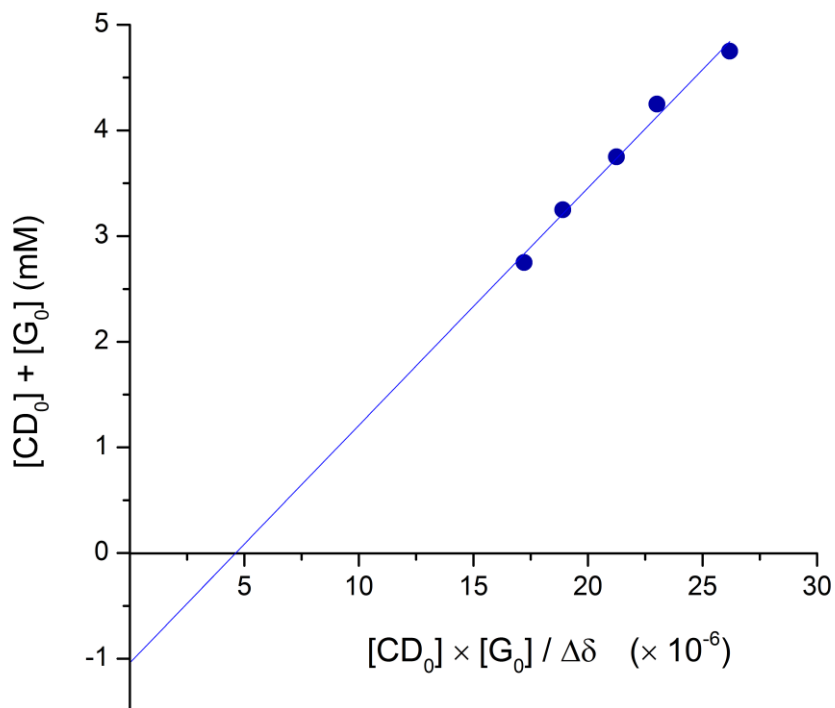

**Figure S1.3:** Graphical analysis of  $^1\text{H}$  NMR shifts of the H5 proton of  $\gamma$ -CD of one assay comprising a series of aqueous solutions containing 0.25 mM of  $\gamma$ -CD and 2.5, 3.0, 3.5, 4.0 and 4.5 mM of aescin. Data is fitted to a line with  $r^2$  value of 0.9834 and  $x_0$  (yy-intercept) of -0.00102, which allows estimating  $K_{\text{app}} = 1/x_0 = 980 \text{ M}^{-1}$ .
